# Supplementary material for: Dynamic Changes in Metabolite Accumulation and the Transcriptome during Leaf Growth and Development in Eucommia ulmoides
Source: MDPI journal article supplement (doi:10.3390/ijms20164030), 2019-08-18
Supplement: s1 [file s1]

Supplementary Materials

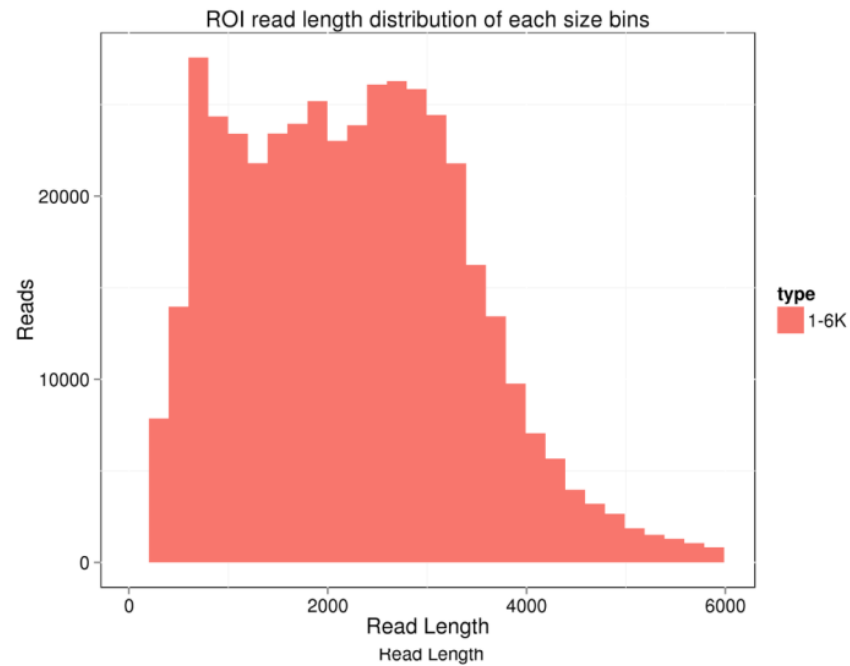

Figure S1. Distribution of read length in the F1 library.

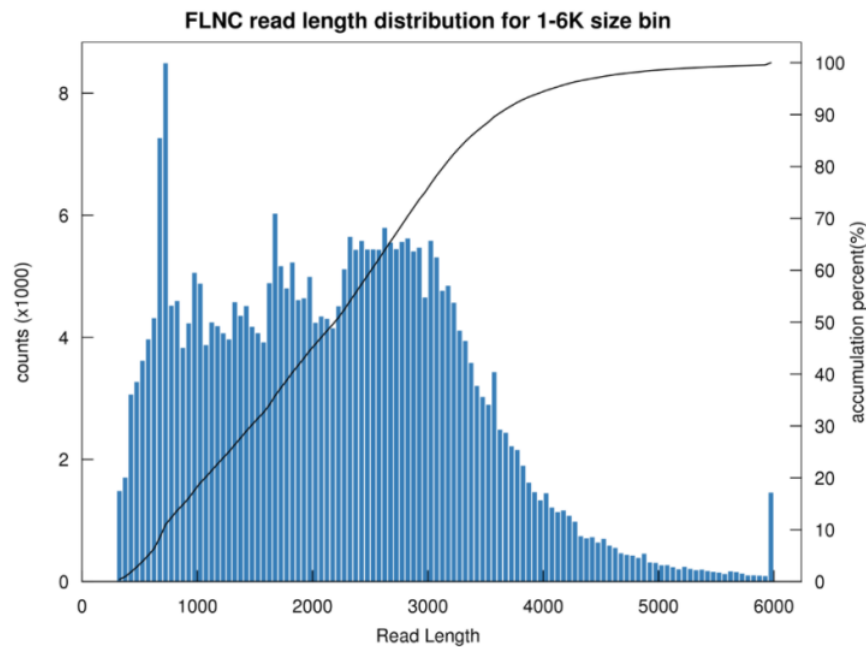

Figure S2. Distribution of read length of full-length non-chimeric (FLNC) reads in the single-molecule long-read sequencing library.

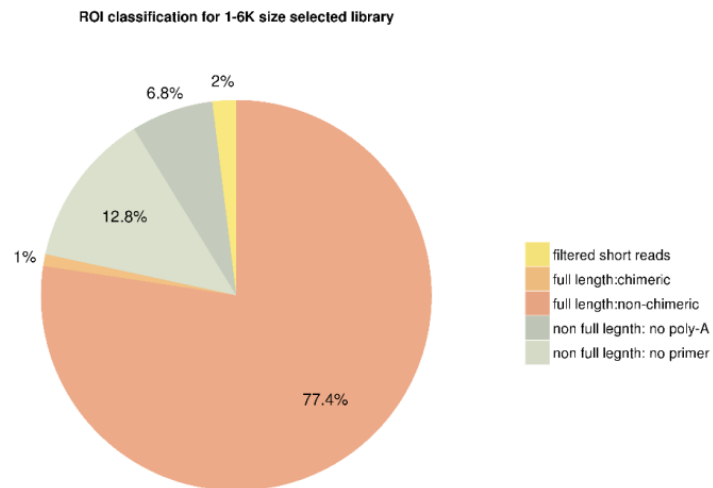

**Figure S3.** ROI classification for 1-6k size selected library.

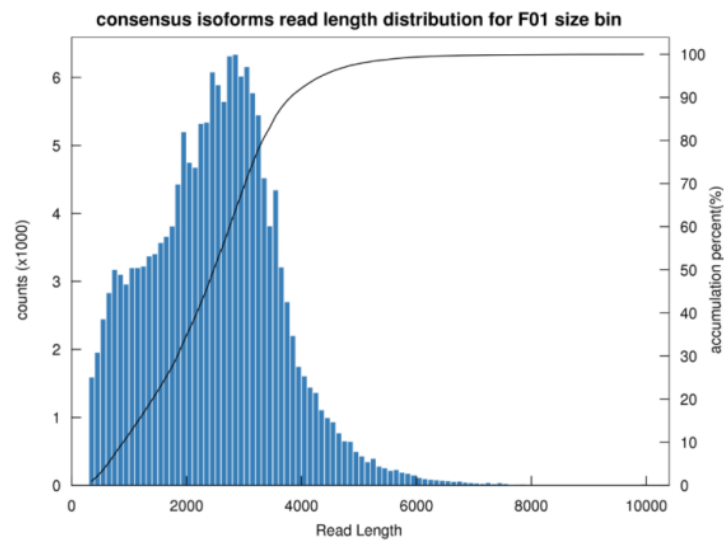

**Figure S4.** Distribution of read length of consensus isoforms reads in the single-molecule long-read sequencing library.

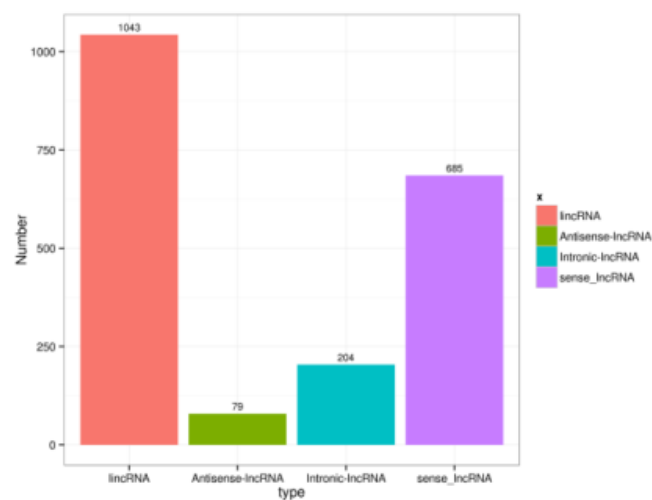

**Figure S5.** The quantity of each type lncRNA.

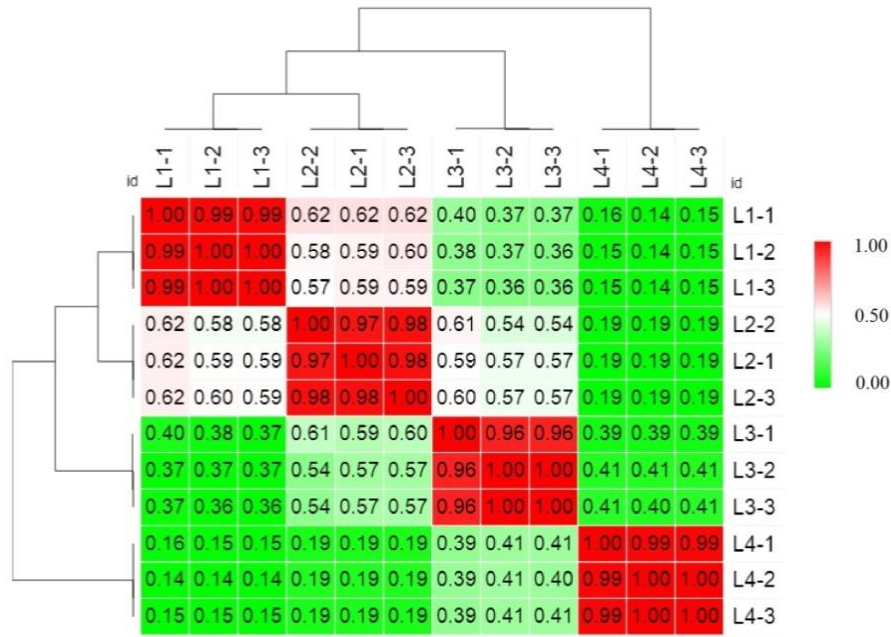

**Figure S6.** Hierarchical clustering of experimental samples based on isoform expression level.

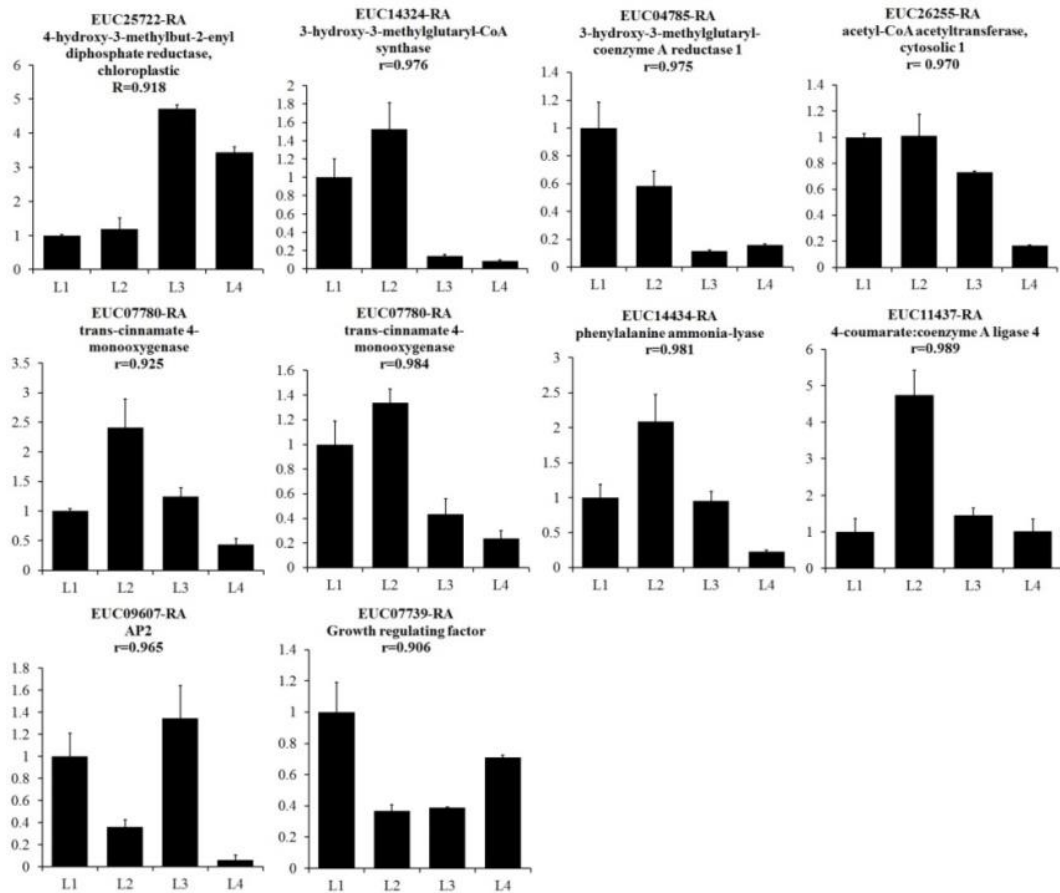

**Figure S7.** Verification of gene expression by qRT-PCR. The relative amount of mRNA (y-axis) is a ratio normalized by *Ubiquitin-conjugating enzyme E2 (UBC E2)*. The leaf growth stages are on the x-axis. R indicates the correlation coefficient for the expression between RNA-Seq and qRT-PCR data. The expression of each gene in L1 was arbitrarily set at 1.0.

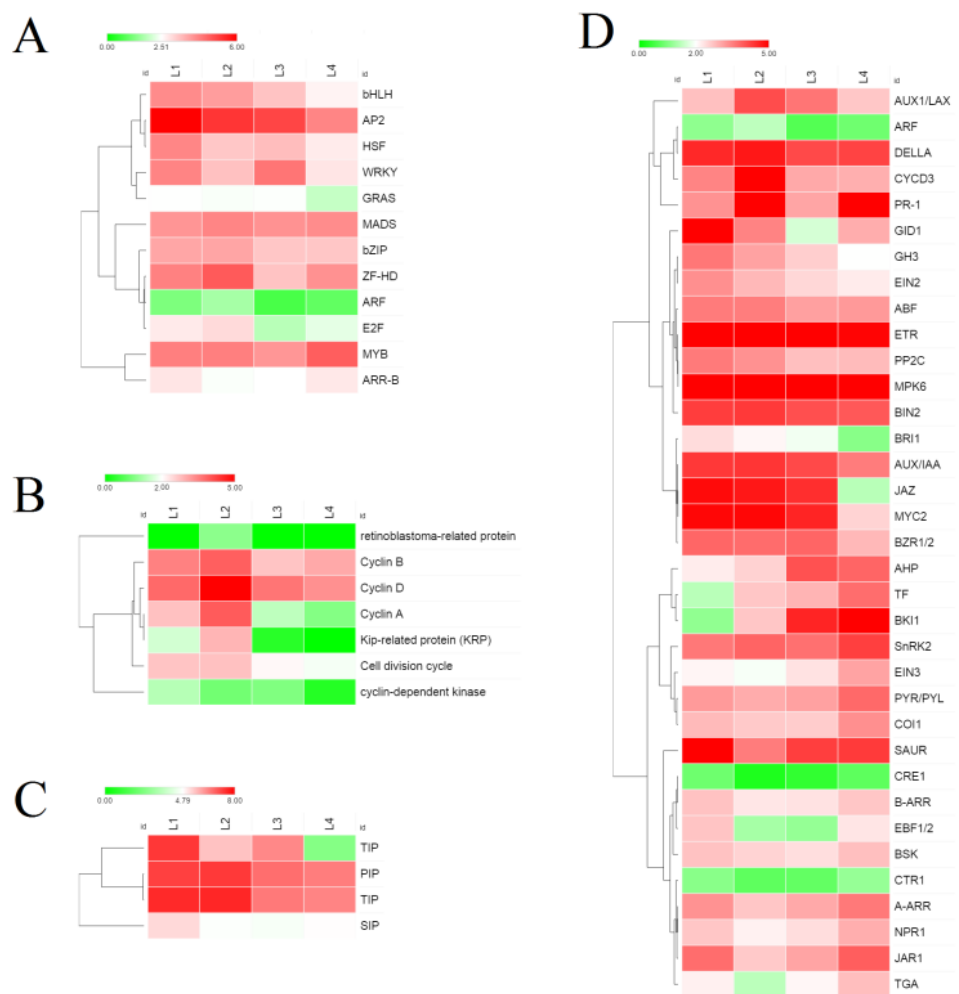

**Figure S8.** Expression profiles of isoforms involved in *E. ulmoides* leaf growth and development. (a) plant growth, flavonoid and Phenylalanine synthesis related transcription factor, (b) cell cycle, (c) aquaporins, (d) plant hormone signaling. Green indicates low expression, and red indicates high expression. The colour scale represents log<sub>2</sub>-transformed FPKM values.

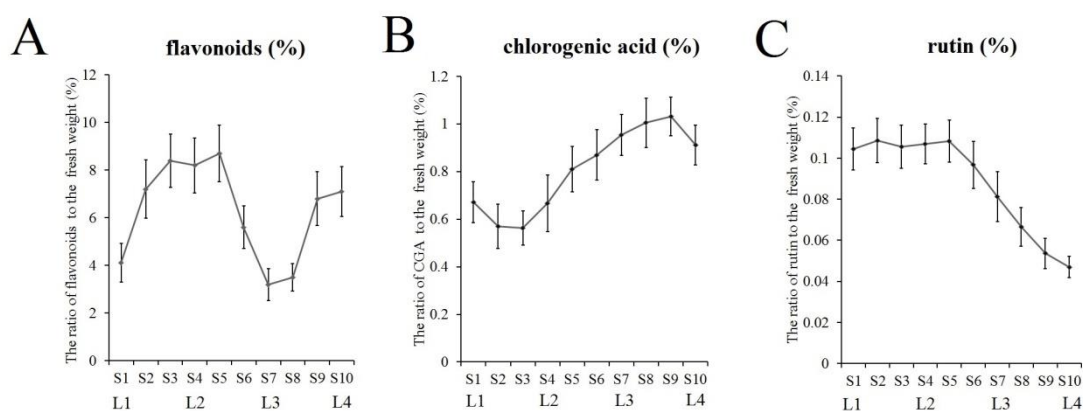

**Figure S9.** The ratio of flavonoids, chlorogenic acid (CGA) and rutin to fresh weight during leaf growth and development. (a) flavonoids, (b) chlorogenic acid, (c) rutin. The Y-axis represents the metabolite content ratio, while the X-axis represents the different leaf growth stages. The corresponding stages used for RNA-seq and metabolome profiling are shown below the abscissa.

**Table S1.** Reads of insert in each single-molecule long-read sequencing libraries.

| Sample s | cDNA Size | Reads of Insert | Number of five prime reads | Number of three prime reads | Number of poly-A reads | Number of filtered short reads | Number of non-full-length reads | Number of full-length reads | Number of full-length non-chimeric reads | Full-Length Percentage (FL%) | Artificial Concatemers (%) |
|----------|-----------|-----------------|----------------------------|-----------------------------|------------------------|--------------------------------|---------------------------------|-----------------------------|------------------------------------------|------------------------------|----------------------------|
| F01      | All       | 437,720         | 389,156                    | 389,428                     | 372,847                | 8,628                          | 85,992                          | 343,100                     | 338,813                                  | 78.38%                       | 1.25%                      |

**Table S2.** Overview of mapping of the Second-generation sequencing reads.

| Sample | Total Reads | Mapped reads | Uniquely mapped reads | Multiple mapped reads |
|--------|-------------|--------------|-----------------------|-----------------------|
| L1-1   | 44176832    | 92.06%       | 84.72%                | 7.34%                 |
| L1-2   | 43119074    | 91.72%       | 85.02%                | 6.70%                 |
| L1-3   | 41524958    | 91.99%       | 85.46%                | 6.53%                 |
| L2-1   | 42440780    | 91.08%       | 83.29%                | 7.79%                 |
| L2-2   | 44752828    | 92.25%       | 81.98%                | 10.26%                |
| L2-3   | 52310780    | 91.08%       | 83.14%                | 7.95%                 |
| L3-1   | 40981618    | 89.96%       | 78.64%                | 11.32%                |
| L3-2   | 44865570    | 90.11%       | 83.58%                | 6.52%                 |
| L3-3   | 43083694    | 90.16%       | 83.41%                | 6.75%                 |
| L4-1   | 43664172    | 90.67%       | 84.02%                | 6.65%                 |
| L4-2   | 42693852    | 90.70%       | 83.58%                | 7.11%                 |
| L4-3   | 49195088    | 90.95%       | 84.45%                | 6.50%                 |

**Table S7.** Primers used for qRT-PCR analysis.

| Primer name      | Annotation                                                        | Sequence               |
|------------------|-------------------------------------------------------------------|------------------------|
| EUC07780-RA F    | trans-cinnamate 4-monooxygenase                                   | CACATGAACCTCCATGATGC   |
| EUC07780-RA R    |                                                                   | TAATTCCGAGAATCGGCAAG   |
| EUC14434-RA F    | phenylalanine ammonia-lyase                                       | GCTGCGATCGGAAACTCAT    |
| EUC14434-RA R    |                                                                   | TGAGATCAAGCCCAACGAGT   |
| EUC04785-RA F    | 3-hydroxy-3-methylglutaryl-coenzyme A reductase 1                 | CTCTATGTTGTTGGCGGACG   |
| EUC04785-RA R    |                                                                   | GGAGACCATGTTTCATCCCCA  |
| EUC26255-RA F    | acetyl-CoA acetyltransferase, cytosolic 1                         | TGTTGCACGTACACCAATGG   |
| EUC26255-RA R    |                                                                   | GCCCCAAATTTGCACTGAGA   |
| EUC25722-RA F    | 4-hydroxy-3-methylbut-2-enyl diphosphate reductase, chloroplastic | GACTTGACTTTGCCGGAGAC   |
| EUC25722-RA R    |                                                                   | CGCGATTCATGAGCTCCAAA   |
| EUC14324-RA F    | 3-hydroxy-3-methylglutaryl-CoA synthase                           | GACTGTGGACGCTGATGAGA   |
| EUC14324-RA R    |                                                                   | GAAAATTGTTTGCCCTCCAA   |
| EUC09607-RA F    | AP2                                                               | GGGAAGGCATTCGAAATACA   |
| EUC09607-RA R    |                                                                   | CGCGTAAGATGGCAACAAAT   |
| EUC07739-RA F    | Growth regulating factor                                          | TCGGTTTTGGAGGCATTG     |
| EUC07739-RA R    |                                                                   | GGTCCCGGAATGCCCTATAA   |
| EUC07780-RA F    | trans-cinnamate 4-monooxygenase                                   | CACATGAACCTCCATGATGC   |
| EUC07780-RA R    |                                                                   | TAATTCCGAGAATCGGCAAG   |
| EUC11437-RA F    | 4-coumarate:coenzyme A ligase 4                                   | GCACTGTTGGAGCAGATTCA   |
| EUC11437-RA R    |                                                                   | GGCAGTCTGGTACGAAGAGC   |
| QUBCF            | UBC E2                                                            | AGTGGGTGGTGCTGTAGTCC   |
| QUBCR            |                                                                   | AACTCCCGTTTCGTTTGTTG   |
| AS EUC12362-RA F | bZIP                                                              | GCTTCAATTACTCGTTGATGCT |
| AS EUC12362-RA R |                                                                   | GGC                    |

|                     |                                                  |                        |
|---------------------|--------------------------------------------------|------------------------|
|                     |                                                  | GTGATAGAGCATCTTCTGCCT  |
|                     |                                                  | GCTG                   |
| AS EUC14737-RA F    |                                                  | GCAACCTACGAGGCGGCAAA   |
| AS EUC14737-RA R    | Camellia sinensis mitoferrin-like                | ATCGGGAACCATTACACGA    |
|                     |                                                  | ACTCA                  |
| AS EUC14719-RA.gene |                                                  | TGACAGTAGCGGTTATGGAGG  |
| F                   |                                                  | TTC                    |
| AS EUC14719-RA.gene | PHD finger transcription factor                  | CACTAAGCAAAATTTAAGGTC  |
| R                   |                                                  | CCTTCC                 |
| AS PB.1020 F1       |                                                  | TCGATCGTGAACCCATCCATC  |
|                     |                                                  | GAAAC                  |
| AS PB.1020 R1       | RING/FYVE/PHD zinc finger<br>superfamily protein | TCACATGACATGGAAGCCAA   |
|                     |                                                  | ATATCT                 |
| AS PB.1020 F2       |                                                  | GGGCTTTCAGTTTATTGCAGC  |
|                     |                                                  | GTTGAA                 |
| AS PB.1020 R2       | RING/FYVE/PHD zinc finger<br>superfamily protein | GGTCCTGATTGTGCTCTTGTCA |
|                     |                                                  | TCGAT                  |

---
